# Supplementary material
Source: publisher site journal article supplement (https://www.dovepress.com/article/455633)
Supplement: Supplementary file 1 [file get_supplementary_file.php]

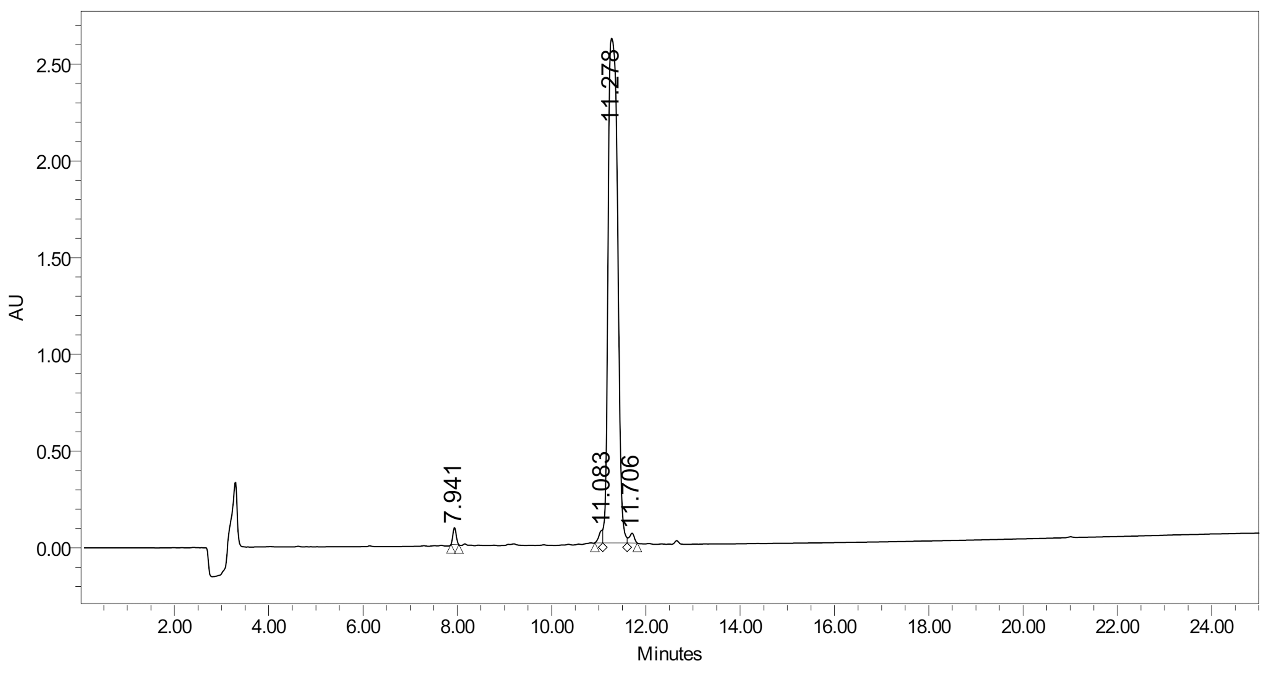


**Figure S1. HPLC of IALLIPF.**


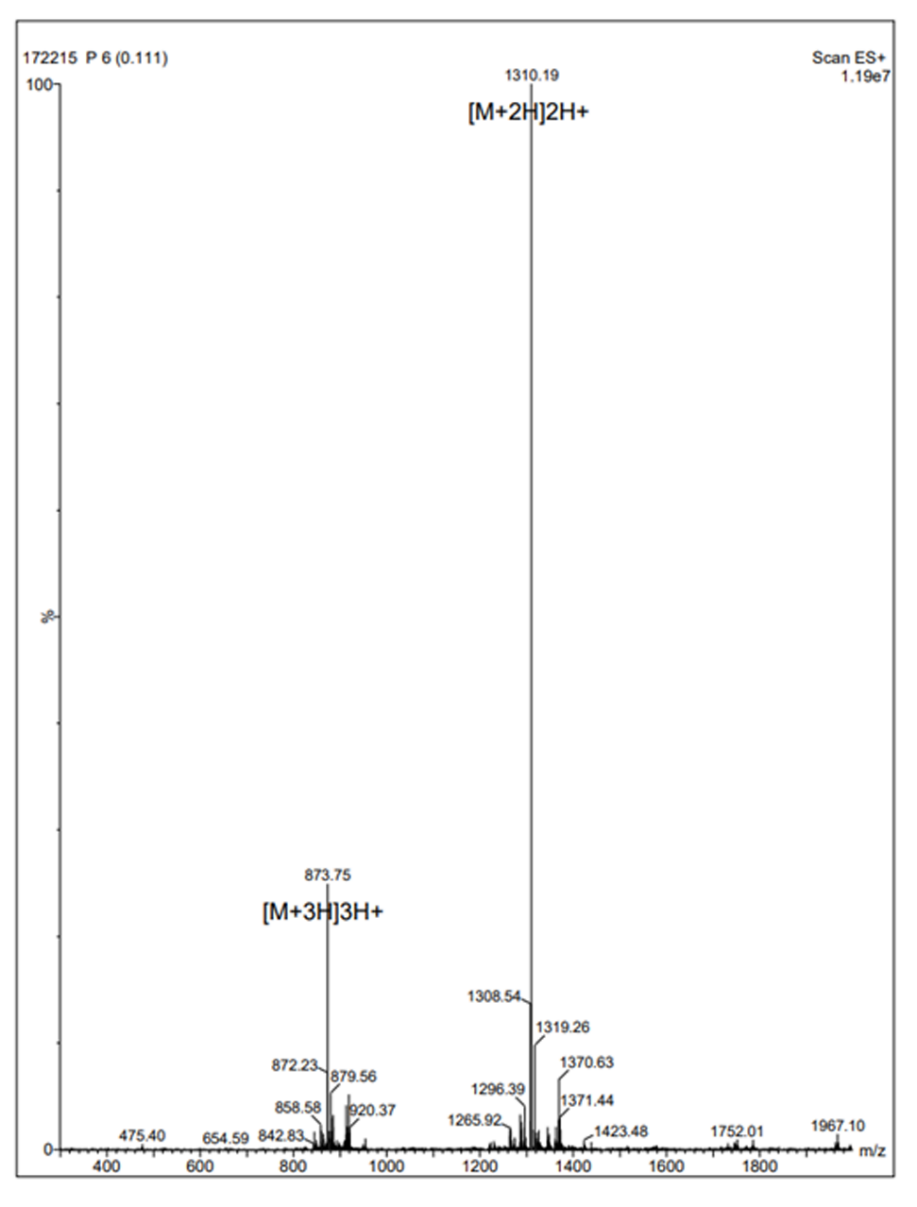


**Figure S2. MS of IALLIPF.**


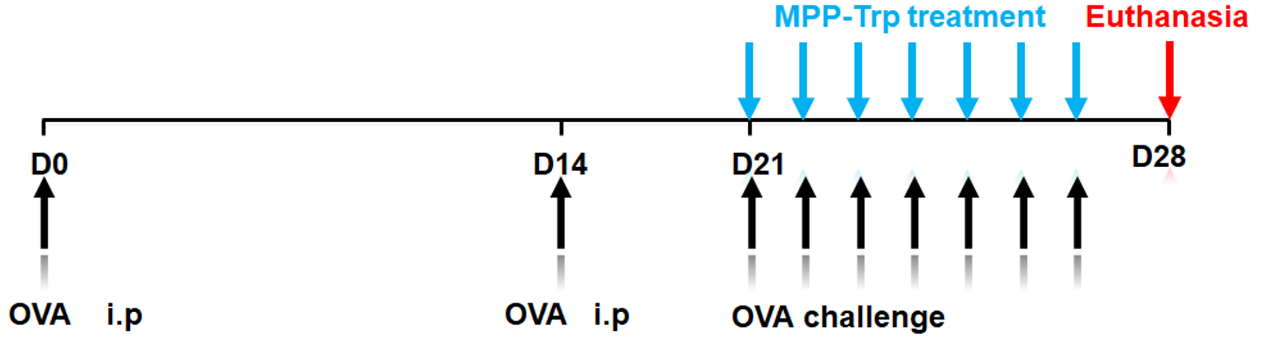


**Figure S3. Schedule of asthma model and treatment with MPP-Trp.** Mice were initially sensitized on day 0 and day 14 with OVA. Subsequently, MPP-Trp was dissolved in PBS and given by tail vein injection once a day 10 min before OVA challenge for 7 days (from day 21 to day 27). Mice were euthanized with excessive doses of anesthetic on day 28.


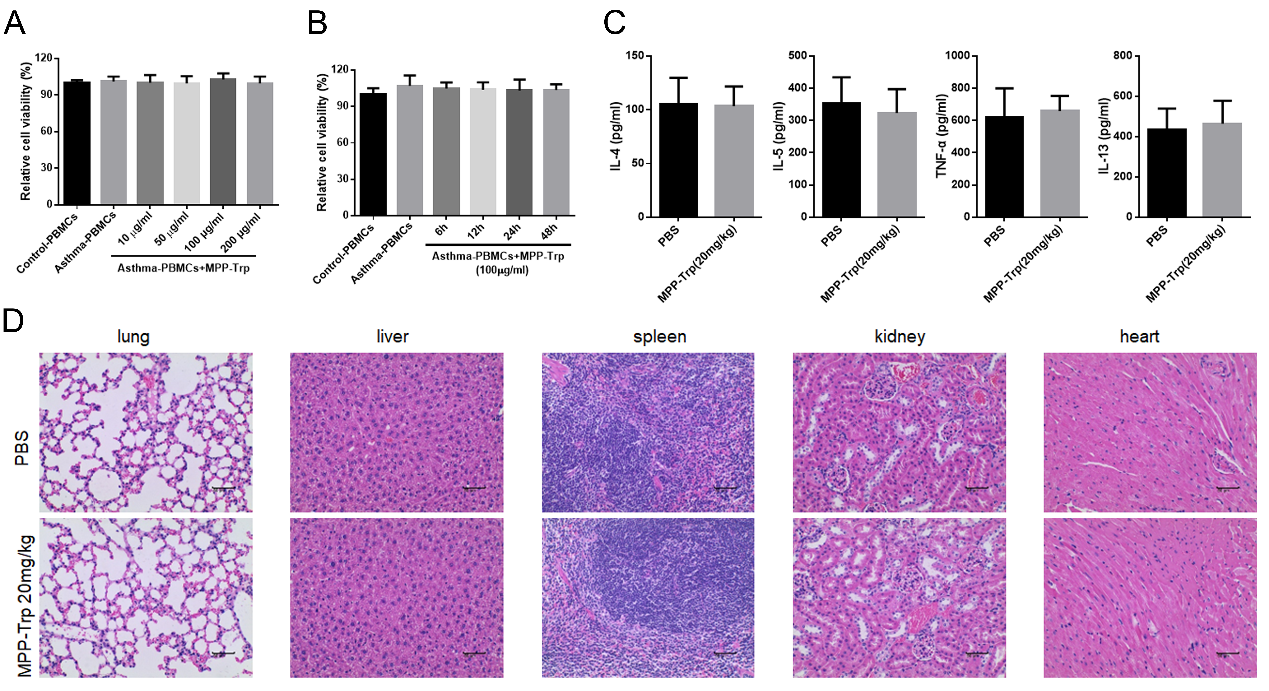


**Figure S4. The cytotoxicity of the MPP-Trp on cells and mice.** (**A**) In Control-PBMCs, Asthma-PBMCs, and Asthma-PBMCs+MPP-Trp (10, 50, 100 and 200 μg/mL) group, the relative cell viabilities were examined by CCK8 assay. (**B**) In Control-PBMCs, Asthma-PBMCs, and Asthma-PBMCs+MPP-Trp (100 μg/ml MPP-Trp for 6, 12, 24 and 48h) group, the relative cell viabilities were examined by CCK8 assay. (**C**) For MPP-Trp (20 mg/kg) alone in non-sensitized and non-challenged mice and control mice, the cytokines (IFN-α, IL-4, IL-13, and IL-5) levels were detected by ELISA, and (**D**) histological analysis of heart, liver, spleen, lung, and kidney was performed by haematoxylin and eosin.
